# Supplementary material for: RAD51B in Familial Breast Cancer
Source: PubMed Central journal article supplement (PMC4858276; doi:10.1371/journal.pone.0153788), 2016-05-05

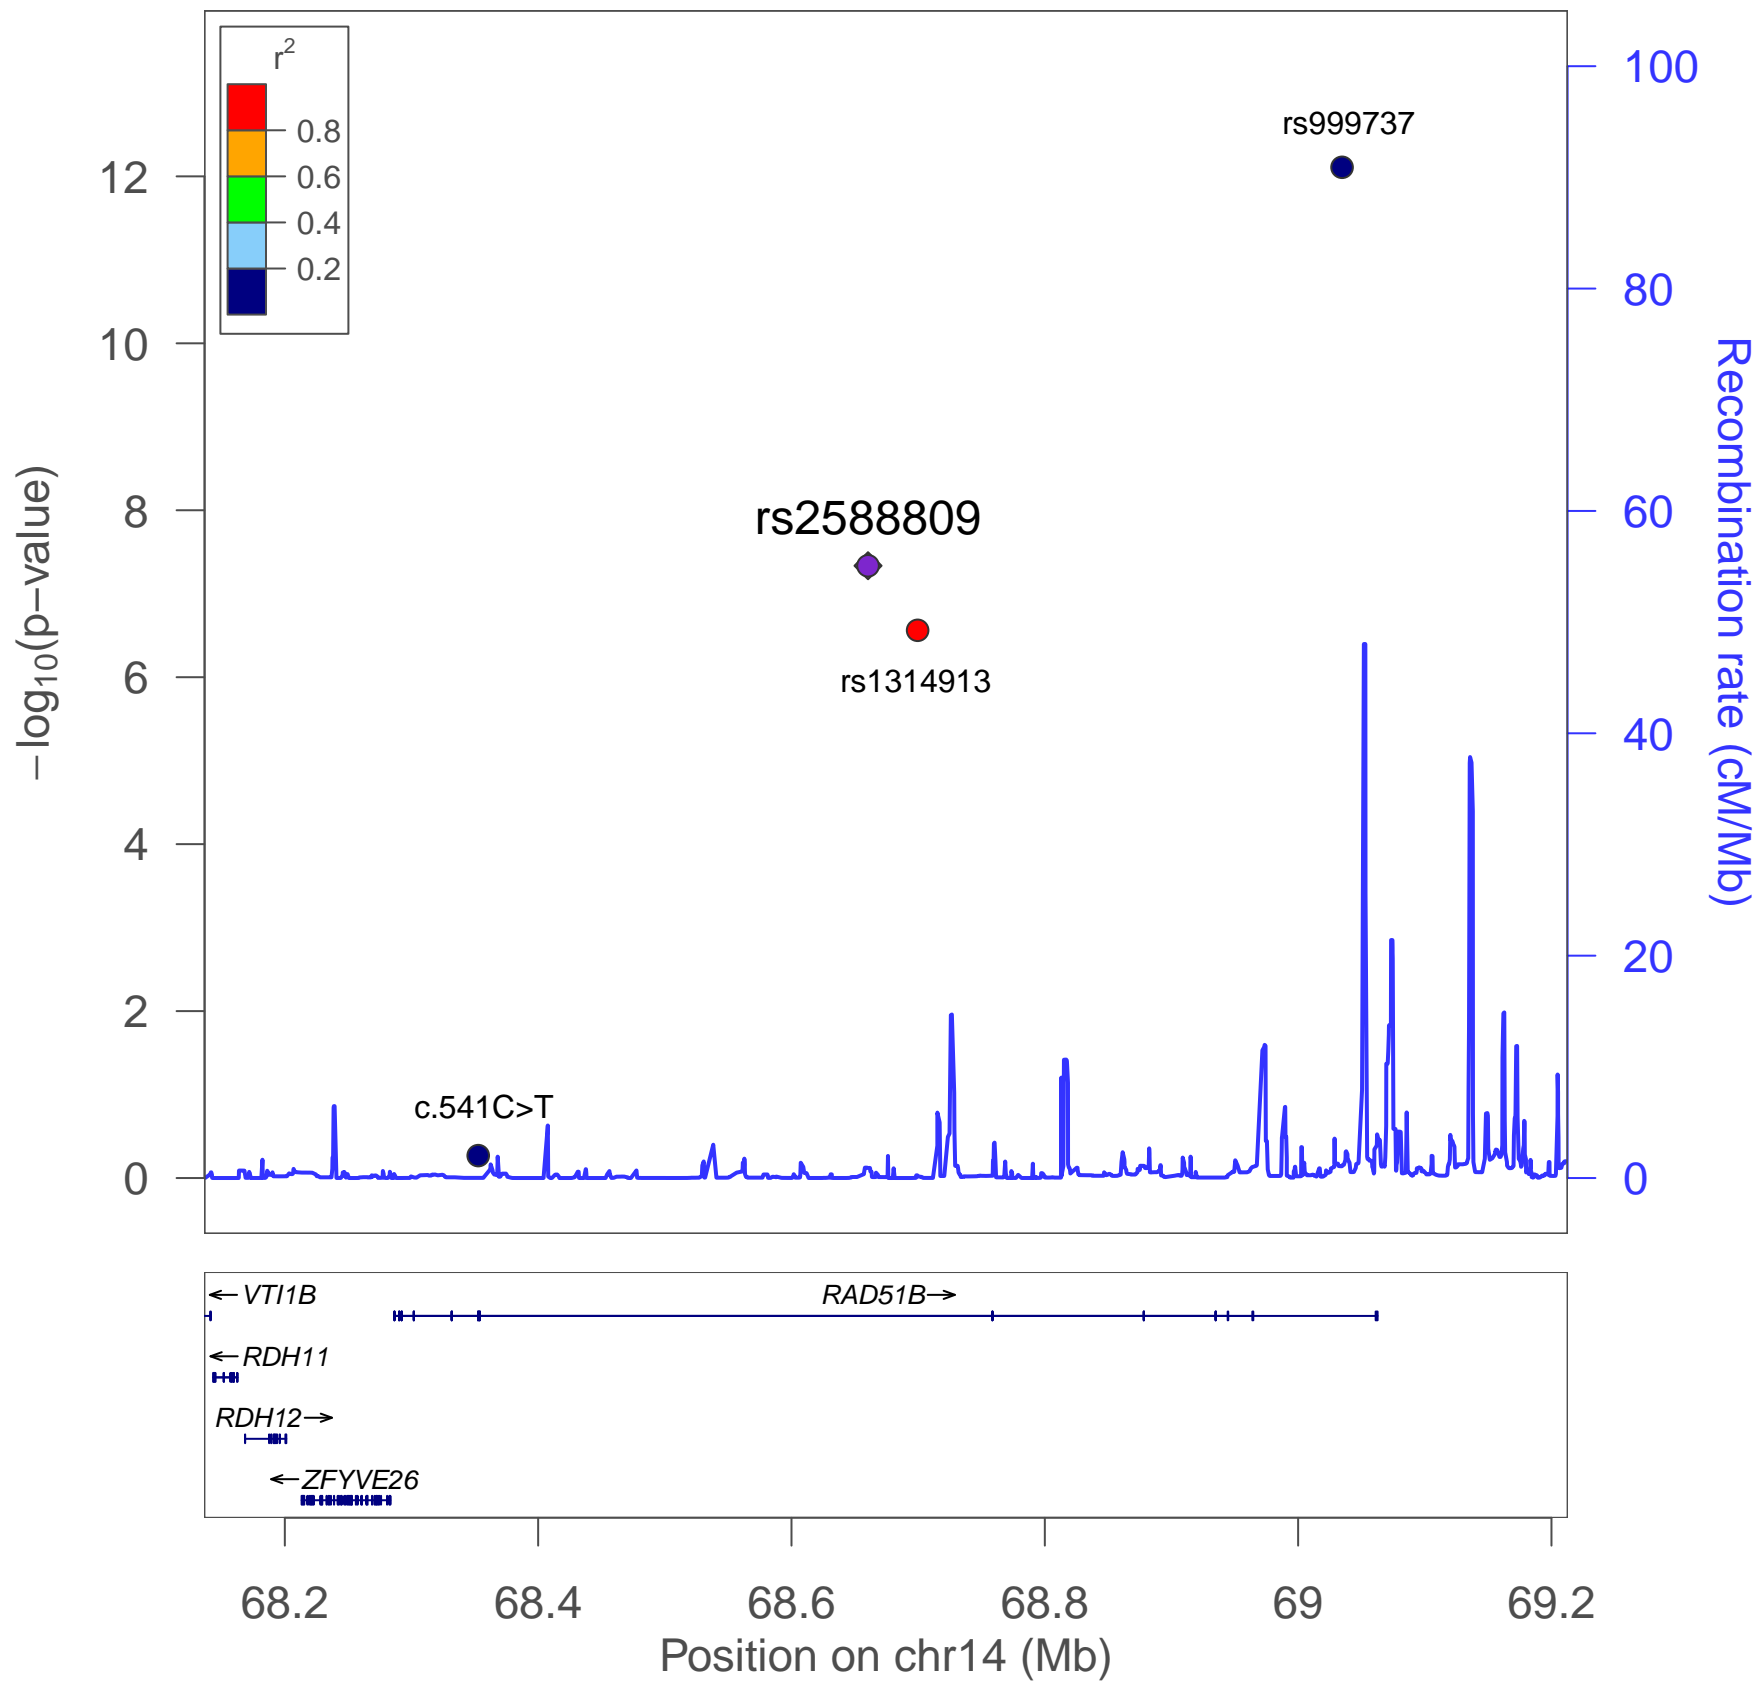

Supplement: pone.0153788.s001.pdf [file pone.0153788.s001.pdf]
